# Supplementary material for: Mycobacterium tuberculosis Transcriptional Adaptation, Growth Arrest and Dormancy Phenotype Development Is Triggered by Vitamin C
Source: PubMed Central journal article supplement (PMC2877710; doi:10.1371/journal.pone.0010860), 2010-05-27
Supplement: pone.0010860.s003.pdf [file pone.0010860.s003.pdf]

**Table S2. Primers used for quantitative reverse transcriptase-PCR analysis**

| Gene (Rv No.)          | Primer*                                | Primer sequence 5' → 3'                       |
|------------------------|----------------------------------------|-----------------------------------------------|
| <i>16S rRNA/rrs</i>    | <i>16S rRNA</i> F<br><i>16S rRNA</i> R | ATGACGGCCTTCGGGTTGTAA<br>CGGCTGCTGGCACGTAGTTG |
| <i>devR</i> (Rv3133c)  | <i>devR</i> f4<br><i>devR</i> r3       | CCGATCTGCGCTGTCTGATC<br>GTCCAGCGCCCACATCTTT   |
| <i>devS</i> (Rv3132c)  | <i>devSint1</i> F<br><i>devSint1</i> R | TACTGACCGACCGGGATCGT<br>AGAGCCGCTGGATGACATGG  |
| <i>Rv3134c</i>         | <i>Rv3134c</i> F<br><i>Rv3134c</i> R   | CTGGCTGGGTCGGCCTTA<br>GCTGACCTGGGAGGTTGTCCG   |
| <i>hspX</i> (Rv2031c)  | <i>Rv2031c</i> F<br><i>Rv2031c</i> R   | CGCACCGAGCAGAAGGA<br>ACCGTGCGAACGAAGGAA       |
| <i>fdxA</i> (Rv2007c)  | <i>fdxA</i> F<br><i>fdxA</i> R         | TGTCCGGTCGACTGTATCTATGA<br>GGCAGGCCGGTTTGC    |
| <i>icl</i> (Rv0467)    | <i>icl</i> F<br><i>icl</i> R           | GGACCAGATGCTGGCCTA<br>CTGCCAGCTCCTTCTGGA      |
| <i>espA</i> (Rv3616c)  | <i>Rv3616c</i> F<br><i>Rv3616c</i> R   | CCTCGGAGAAGTGTGGGAGT<br>CGAGAGAACAGTCCGGTCAC  |
| <i>mymA</i> (Rv3083)   | <i>Rv3083</i> F<br><i>Rv3083</i> R     | CGATCCCCGTCGTACATC<br>ACTCGTAGACCCAGCGATCC    |
| <i>fadD13</i> (Rv3089) | <i>Rv3089</i> F<br><i>Rv3089</i> R     | GCCCCGACTTCCGCTACTT<br>CGTAACCCTGCACGACCT     |
| <i>ahpC</i> (Rv2428)   | <i>ahpC</i> F<br><i>ahpC</i> R         | CCGGCGACTACTTCACCA<br>TCGGTAGGGCACACGAAC      |
| <i>furA</i> (Rv1909c)  | <i>furA</i> F<br><i>furA</i> R         | GCCGATGTCGACTGTGCT<br>GTAGATGACCTCCGCCTCGT    |
| <i>katG</i> (Rv1908c)  | <i>katG</i> F<br><i>katG</i> R         | CCTCCGAGTCACTGACCAAC<br>GGTAGGTCCCCTCATCTGCT  |
| <i>glbN</i> (Rv1542c)  | <i>Rv1542c</i> F<br><i>Rv1542c</i> R   | GCCCTCCGAAACGATCAC<br>TCAGACTGGTGCCGTGGT      |
| <i>dosT</i> (Rv2027c)  | <i>Rv2027c</i> F<br><i>Rv2027c</i> R   | CGACCTGGTCATCGTAGAGG<br>AAGACTCCCCCGATCGAC    |
| <i>Rv1771</i>          | <i>Rv1771</i> F<br><i>Rv1771</i> R     | GGGGAAGTGCTCAGTCTGTC<br>GAACCGTCTGCAGGGTGA    |

\*F and R suffix in each primer name refer to forward and reverse primer, respectively.
