# Supplementary material for: Mycobacterium tuberculosis Transcriptional Adaptation, Growth Arrest and Dormancy Phenotype Development Is Triggered by Vitamin C
Source: PubMed Central journal article supplement (PMC2877710; doi:10.1371/journal.pone.0010860), 2010-05-27

Figure S3

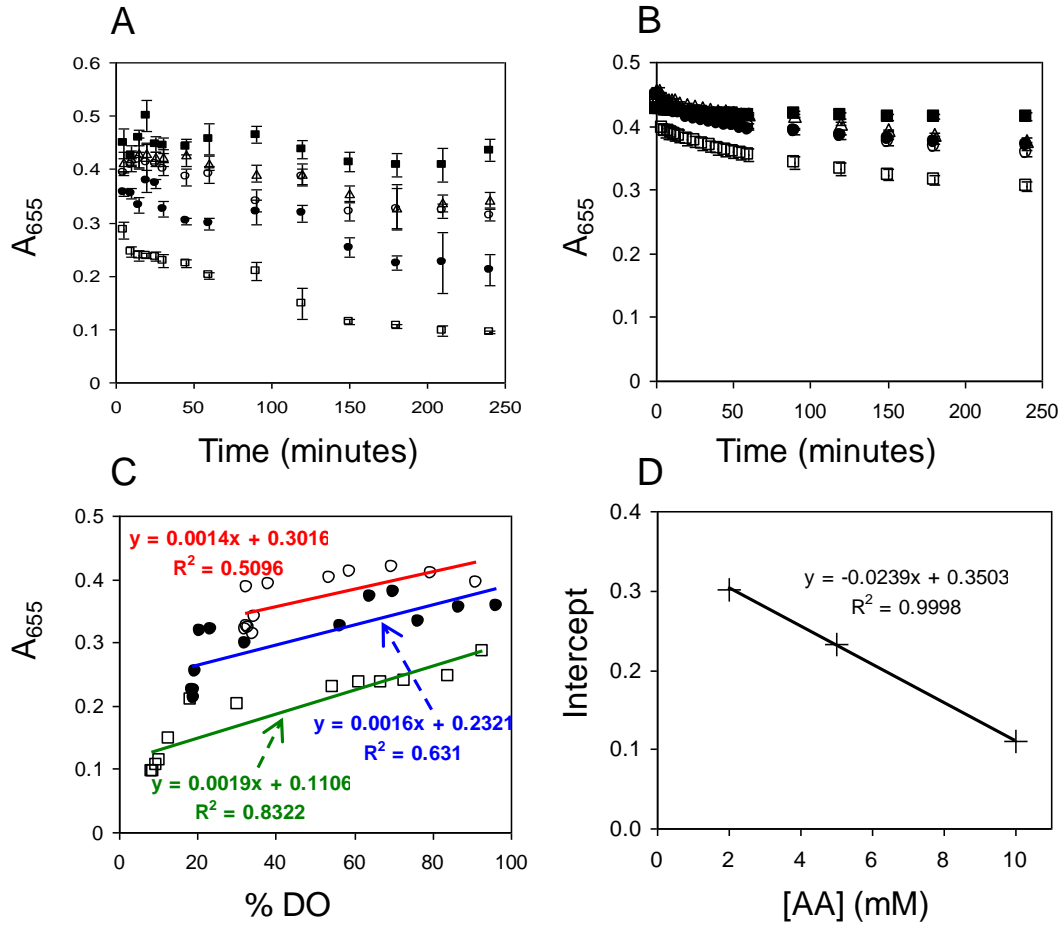

Supplement: pone.0010860.s006.pdf [file pone.0010860.s006.pdf]
