# Supplementary material for: Mycobacterium tuberculosis Transcriptional Adaptation, Growth Arrest and Dormancy Phenotype Development Is Triggered by Vitamin C
Source: PubMed Central journal article supplement (PMC2877710; doi:10.1371/journal.pone.0010860), 2010-05-27
Supplement: pone.0010860.s008.pdf [file pone.0010860.s008.pdf]

Figure S5

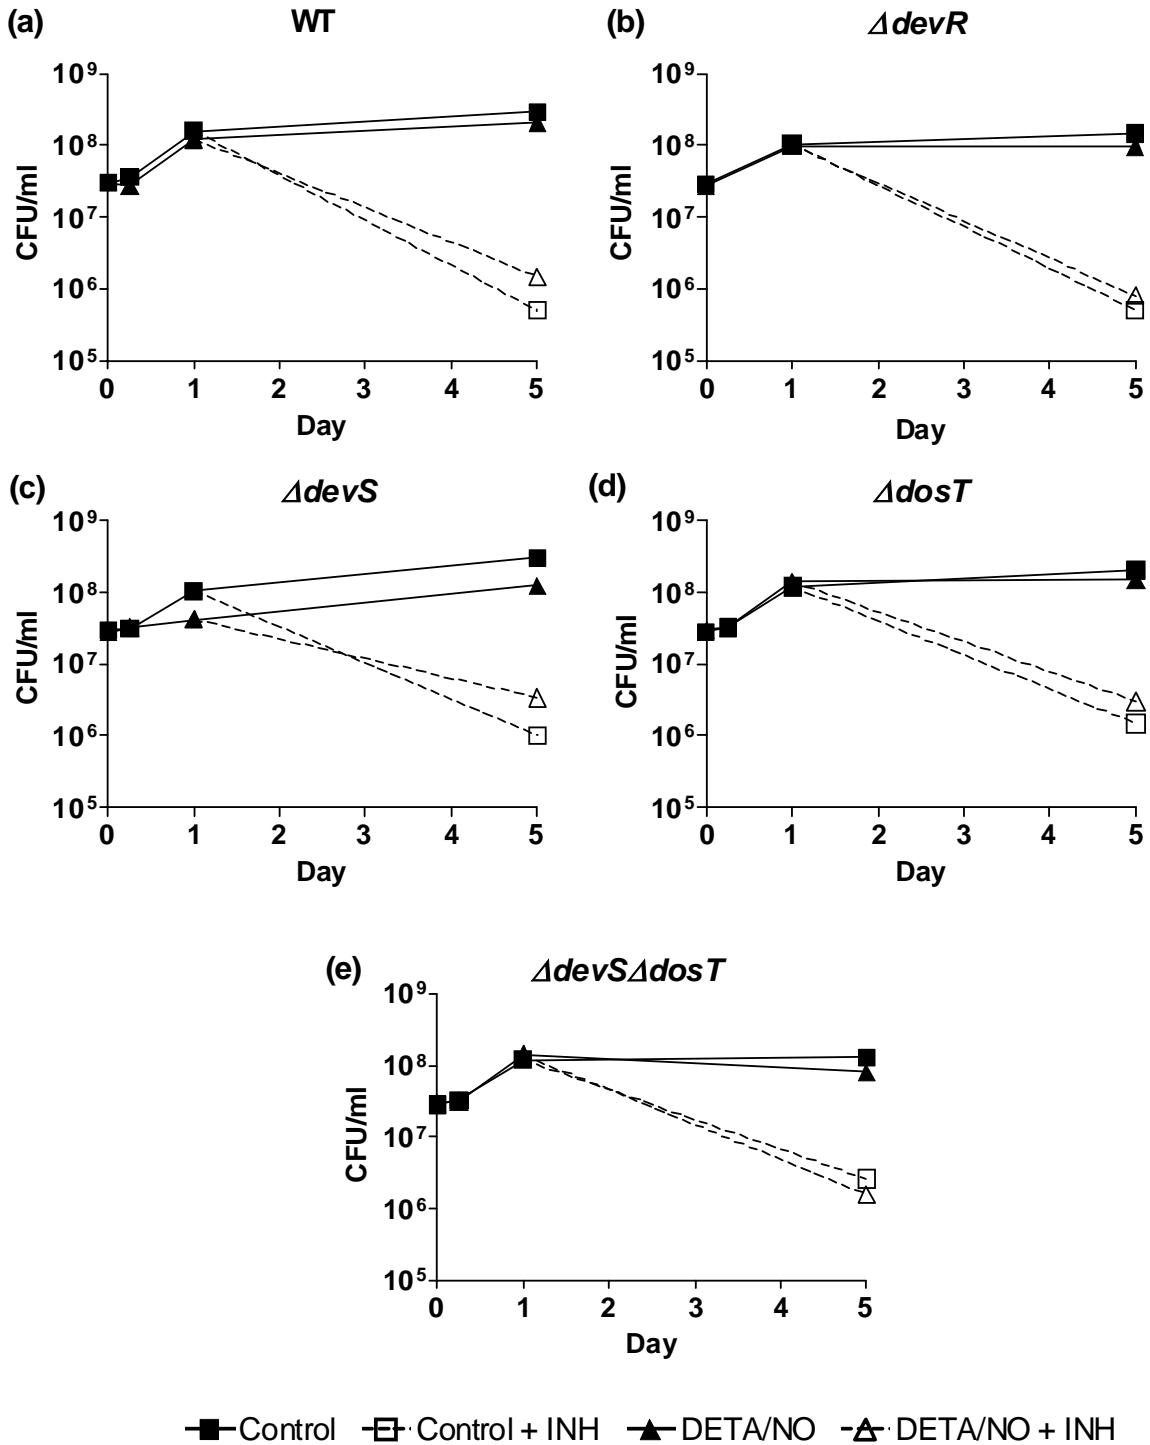

Figure S5. Growth and INH sensitivity of DETA/NO-treated *M. tb* strains. Growth and viability of DETA/NO-treated *M. tb* strains monitored by CFU counts after exposure to 50  $\mu$ M DETA/NO for 1 day followed by a 4-day INH drug treatment. Data is shown from one of two independent experiments with similar results.
