# Supplementary material for: Mycobacterium tuberculosis Transcriptional Adaptation, Growth Arrest and Dormancy Phenotype Development Is Triggered by Vitamin C
Source: PLoS One. 2010 May 27;5(5):e10860. doi: 10.1371/journal.pone.0010860 (PMC2877710; doi:10.1371/journal.pone.0010860)
Supplement: Text S1 — Some reactions of Ascorbic acid. (0.07 MB DOC) [file pone.0010860.s001.doc]

**Text S1**

**Some reactions of Ascorbic acid**

AA participates in a large number of reactions due to its chemical reactivity. The reactions that are relevant to the action of AA observed in this study are given below.

1. O2 scavenging action. AA scavenges O2 (1) and leads to the generation of H2O2 .

AA + O2  DHA + H2O2

1. Iron reducing effect of AA. AA is used to maintain iron in the ferrous state in biological assays (2).

4Fe3+ + 2AA + O2  2DHA + 4Fe2+ + 2H2O

3. Reaction of methylene blue with AA (3).

Methylene blue + AA  Leucomethylene blue + DHA

(blue) (colourless)

References.

1. Scarpa M, Stevanato R, Viglino P, Rigo A (1983) Superoxide ion as active intermediate in the autoxidation of ascorbate by molecular oxygen. Effect of superoxide dismutase. J Biol Chem 258: 6695-6697.
2. Agranoff D, Monahan IM, Mangan JA, Butcher PD, Krishna S (1999) *Mycobacterium tuberculosis* expresses a novel pH-dependent divalent cation transporter belonging to the Nramp family. J Exp Med 190: 717-724.
3. Mowry S, Ogren PJ (1999) Kinetics of Methylene Blue Reduction by Ascorbic Acid. *J.* Chem. Educ. 76: 970-973.
